# Supplementary material for: Interaction of Arabidopsis Trihelix-Domain Transcription Factors VFP3 and VFP5 with Agrobacterium Virulence Protein VirF
Source: PLoS One. 2015 Nov 16;10(11):e0142128. doi: 10.1371/journal.pone.0142128 (PMC4646629; doi:10.1371/journal.pone.0142128)
Supplement: S2 Table — (XLSX) [file pone.0142128.s002.xlsx]

## Sheet: Sheet1
Table S2. Genes down-regulated in VFP3 RNAi-1 plants
TAIR locus	Wild-type	VFP3 RNAi-1	log2FoldChange	padj	short_descript
AT4G16590	243.306	2.2588	-6.75107	1.3382e-143	cellulose synthase-like A01
AT3G05730	59.642	1.25474	-5.57086	3.36394e-125
AT3G16670	43.9513	1.10417	-5.31487	1.15734e-120	Pollen Ole e 1 allergen and extensin family protein
AT3G24420	103.435	1.71672	-5.91292	6.62059e-120	alpha/beta-Hydrolases superfamily protein
AT1G31690	55.5061	1.27492	-5.44417	1.93442e-118	Copper amine oxidase family protein
AT3G28220	485.682	8.15972	-5.89535	5.22671e-109	TRAF-like family protein
AT3G56970	30.0884	1.01051	-4.89605	1.13041e-104	basic helix-loop-helix (bHLH) DNA-binding superfamily protein
AT3G44990	98.5542	1.87849	-5.71327	2.58319e-103	xyloglucan endo-transglycosylase-related 8
AT4G13410	29.0678	1.11033	-4.71036	2.68548e-92	Nucleotide-diphospho-sugar transferases superfamily protein
AT2G30766	168.166	7.92435	-4.40745	1.93652e-89
AT4G17470	58.5505	2.15623	-4.7631	1.28905e-84	alpha/beta-Hydrolases superfamily protein
AT4G12730	68.3953	2.72444	-4.64987	6.53284e-83	FASCICLIN-like arabinogalactan 2
AT2G20750	18.2549	1.04991	-4.11995	7.72698e-76	expansin B1
AT4G28780	35.6607	1.63129	-4.45025	1.92306e-75	GDSL-like Lipase/Acylhydrolase superfamily protein
AT2G10940	632.845	35.4151	-4.15941	4.08064e-75	Bifunctional inhibitor/lipid-transfer protein/seed storage 2S albumin superfamily protein
AT2G24850	76.9098	4.82356	-3.995	5.66469e-74	tyrosine aminotransferase 3
AT3G48720	107.5	4.05301	-4.72921	3.85245e-73	HXXXD-type acyl-transferase family protein
AT1G61120	21.0564	1.13486	-4.21367	1.16253e-72	terpene synthase 04
AT1G14250	207.849	12.8599	-4.01459	2.41423e-71	GDA1/CD39 nucleoside phosphatase family protein
AT1G01120	163.5	7.62331	-4.42273	7.53367e-71	3-ketoacyl-CoA synthase 1
AT1G47400	35.9387	1.27094	-4.82157	1.35882e-69
AT2G39030	99.6114	5.50699	-4.17698	2.15065e-69	Acyl-CoA N-acyltransferases (NAT) superfamily protein
AT3G55646	21.1672	1.18827	-4.15489	3.1269e-68
AT1G72610	2015.34	128.686	-3.96909	1.20855e-67	germin-like protein 1
AT3G27690	2497.59	142.153	-4.13502	3.33041e-65	photosystem II light harvesting complex gene 2.3
AT1G29660	336.171	15.9458	-4.39794	4.35578e-65	GDSL-like Lipase/Acylhydrolase superfamily protein
AT4G22880	21.542	1.4933	-3.85058	8.37791e-65	leucoanthocyanidin dioxygenase
AT3G29030	86.8471	4.87745	-4.15428	1.04937e-64	expansin A5
AT1G66100	379.178	15.496	-4.61291	2.33805e-64	Plant thionin
AT3G56980	13.9189	1.02671	-3.76095	2.68644e-64	basic helix-loop-helix (bHLH) DNA-binding superfamily protein
AT2G34430	5288.31	384.414	-3.78208	2.05258e-63	light-harvesting chlorophyll-protein complex II subunit B1
AT3G01550	98.3688	6.22184	-3.98279	1.01348e-61	phosphoenolpyruvate (pep)/phosphate translocator 2
AT2G32690	333.727	22.0911	-3.91713	1.58815e-61	glycine-rich protein 23
AT5G05270	29.0944	1.69834	-4.09854	4.02313e-61	Chalcone-flavanone isomerase family protein
AT2G36590	19.4962	1.21896	-3.99947	1.539e-60	proline transporter 3
AT5G41900	20.8601	1.24482	-4.06674	2.34479e-60	alpha/beta-Hydrolases superfamily protein
AT5G05580	143.756	9.09264	-3.98278	4.08152e-60	fatty acid desaturase 8
AT4G18440	959.42	59.4557	-4.01228	5.28556e-60	L-Aspartase-like family protein
AT3G43720	58.1337	3.49526	-4.0559	5.42913e-60	Bifunctional inhibitor/lipid-transfer protein/seed storage 2S albumin superfamily protein
AT1G04680	55.9643	3.99184	-3.80938	1.25466e-59	Pectin lyase-like superfamily protein
AT1G55260	56.0742	3.47328	-4.01297	8.70818e-59	Bifunctional inhibitor/lipid-transfer protein/seed storage 2S albumin superfamily protein
AT3G16370	455.666	28.2291	-4.01272	6.34475e-57	GDSL-like Lipase/Acylhydrolase superfamily protein
AT5G44050	23.3529	1.4436	-4.01586	1.88009e-56	MATE efflux family protein
AT1G04040	158.614	10.7182	-3.88739	1.03781e-55	HAD superfamily, subfamily IIIB acid phosphatase
AT4G01080	130.633	9.00163	-3.85918	2.26681e-55	TRICHOME BIREFRINGENCE-LIKE 26
AT3G11480	14.3623	1.08277	-3.72949	4.65743e-55	S-adenosyl-L-methionine-dependent methyltransferases superfamily protein
AT3G23810	285.046	19.5584	-3.86534	1.38644e-54	S-adenosyl-l-homocysteine (SAH) hydrolase 2
AT1G75900	20.6279	1.39104	-3.89037	2.09085e-54	GDSL-like Lipase/Acylhydrolase superfamily protein
AT5G42800	22.5814	2.11832	-3.41414	2.65204e-54	dihydroflavonol 4-reductase
AT4G00400	41.5837	2.74966	-3.91869	3.81015e-54	glycerol-3-phosphate acyltransferase 8
AT1G60590	28.4498	1.949	-3.86761	2.68781e-53	Pectin lyase-like superfamily protein
AT5G63450	13.533	1.11166	-3.6057	3.06408e-53	cytochrome P450, family 94, subfamily B, polypeptide 1
AT5G02890	20.0431	1.52712	-3.71422	3.61448e-53	HXXXD-type acyl-transferase family protein
AT4G39330	198.674	15.9325	-3.64037	1.0434e-51	cinnamyl alcohol dehydrogenase 9
AT1G56430	49.8947	5.04167	-3.30691	5.94815e-51	nicotianamine synthase 4
AT3G01500	6116.99	569.118	-3.42602	1.84631e-50	carbonic anhydrase 1
AT5G13930	151.41	10.5858	-3.83825	7.96607e-50	Chalcone and stilbene synthase family protein
AT5G01015	18.8599	1.69776	-3.47362	3.08987e-49
AT4G34760	26.163	2.08662	-3.64829	4.22384e-49	SAUR-like auxin-responsive protein family
AT1G65060	22.0279	1.81303	-3.60286	2.44101e-48	4-coumarate:CoA ligase 3
AT5G45950	50.143	3.88098	-3.69155	2.44101e-48	GDSL-like Lipase/Acylhydrolase superfamily protein
AT5G08640	22.0312	1.56009	-3.81985	4.71851e-48	flavonol synthase 1
AT1G73325	48.88	3.99652	-3.61243	1.42957e-47	Kunitz family trypsin and protease inhibitor protein
AT1G64390	100.375	9.51988	-3.39832	2.07837e-47	glycosyl hydrolase 9C2
AT4G04840	92.6931	7.06238	-3.71424	2.10863e-47	methionine sulfoxide reductase B6
AT5G55730	23.8206	2.19514	-3.43982	3.10043e-47	FASCICLIN-like arabinogalactan 1
AT1G27950	131.127	11.7362	-3.48193	1.09552e-46	glycosylphosphatidylinositol-anchored lipid protein transfer 1
AT4G00360	239.329	23.0799	-3.37429	1.13546e-46	cytochrome P450, family 86, subfamily A, polypeptide 2
AT5G54060	11.6424	1.24774	-3.22201	1.35833e-46	UDP-glucose:flavonoid 3-o-glucosyltransferase
AT5G50740	26.0065	2.35501	-3.46507	3.68241e-45	Heavy metal transport/detoxification superfamily protein
AT2G27420	37.6002	3.79619	-3.30811	8.5969e-45	Cysteine proteinases superfamily protein
AT4G24780	164.613	18.5854	-3.14683	1.12826e-44	Pectin lyase-like superfamily protein
AT5G52882	84.1277	8.12287	-3.37252	1.30491e-44	P-loop containing nucleoside triphosphate hydrolases superfamily protein
AT5G25610	538.967	46.1948	-3.5444	4.41387e-44	BURP domain-containing protein
AT1G49430	26.8356	2.05758	-3.70513	4.77243e-44	long-chain acyl-CoA synthetase 2
AT5G44020	330.312	28.2885	-3.54554	2.70078e-43	HAD superfamily, subfamily IIIB acid phosphatase
AT2G14247	29.3139	1.03021	-4.83057	2.11838e-42	Expressed protein
AT5G24420	67.6896	8.68535	-2.96228	3.66839e-42	6-phosphogluconolactonase 5
AT1G20070	32.932	2.87703	-3.51684	4.78971e-42
AT2G42540	162.11	16.1826	-3.32445	8.15858e-42	cold-regulated 15a
AT2G47750	16.1542	1.82779	-3.14374	8.7782e-42	putative indole-3-acetic acid-amido synthetase GH3.9
AT5G24780	617.95	63.2752	-3.28778	4.88417e-41	vegetative storage protein 1
AT5G52320	94.0845	8.71057	-3.43312	4.88417e-41	cytochrome P450, family 96, subfamily A, polypeptide 4
AT1G73600	1178.01	152.79	-2.94673	1.24269e-40	S-adenosyl-L-methionine-dependent methyltransferases superfamily protein
AT5G45280	36.3838	3.57538	-3.34713	1.3034e-40	Pectinacetylesterase family protein
AT5G17700	20.6313	2.55746	-3.01205	1.69096e-40	MATE efflux family protein
AT2G30010	44.8405	5.04098	-3.15302	1.80557e-40	TRICHOME BIREFRINGENCE-LIKE 45
AT2G41240	32.4985	1.04858	-4.95386	3.01902e-40	basic helix-loop-helix protein 100
AT2G43550	84.0362	8.8321	-3.25018	4.38646e-40	Scorpion toxin-like knottin superfamily protein
AT4G37800	199.891	19.6065	-3.34981	7.08859e-40	xyloglucan endotransglucosylase/hydrolase 7
AT3G45140	3879.63	458.951	-3.07951	1.03073e-39	lipoxygenase 2
AT1G64380	25.3778	2.44708	-3.37443	1.64057e-39	Integrase-type DNA-binding superfamily protein
AT3G12110	16.267	1.68385	-3.27211	2.4582e-39	actin-11
AT1G52400	1529.76	194.929	-2.97229	2.45841e-39	beta glucosidase 18
AT1G29670	248.997	27.3609	-3.18594	2.77157e-39	GDSL-like Lipase/Acylhydrolase superfamily protein
AT3G61920	8.91237	1.14707	-2.95785	3.16127e-39
AT2G04780	32.4361	3.33141	-3.28339	8.09428e-39	FASCICLIN-like arabinoogalactan 7
AT3G12610	50.4356	4.46905	-3.4964	8.84753e-39	Leucine-rich repeat (LRR) family protein
AT1G78820	53.6028	6.27839	-3.09384	1.89449e-38	D-mannose binding lectin protein with Apple-like carbohydrate-binding domain
AT2G27402	42.947	3.15137	-3.76851	2.2432e-38
AT4G35350	10.5689	1.29329	-3.0307	2.45145e-38	xylem cysteine peptidase 1
AT5G11420	149.113	17.2985	-3.10769	2.874e-38	Protein of unknown function, DUF642
AT5G58310	55.4353	5.0834	-3.44694	3.98314e-38	methyl esterase 18
AT1G80280	28.5134	3.04863	-3.22541	5.08809e-38	alpha/beta-Hydrolases superfamily protein
AT2G38750	58.7969	3.73322	-3.97725	7.53684e-38	annexin 4
AT5G20630	142.246	7.07655	-4.3292	8.87987e-38	germin 3
AT1G19640	26.3472	3.10884	-3.0832	1.08041e-37	jasmonic acid carboxyl methyltransferase
AT2G37040	147.872	18.419	-3.00508	1.32236e-37	PHE ammonia lyase 1
AT1G12900	4004.74	512.903	-2.96495	1.45421e-37	glyceraldehyde 3-phosphate dehydrogenase A subunit 2
AT5G52570	62.7999	7.6994	-3.02794	2.02671e-37	beta-carotene hydroxylase 2
AT3G49260	52.0751	6.80094	-2.93679	2.33033e-37	IQ-domain 21
AT5G62730	9.20361	1.0823	-3.08811	8.42467e-37	Major facilitator superfamily protein
AT3G54400	19.5528	2.1996	-3.15206	1.55979e-36	Eukaryotic aspartyl protease family protein
AT4G28250	21.7097	2.68552	-3.01507	2.97829e-36	expansin B3
AT2G38240	7.59494	1.04072	-2.86745	3.91766e-36	2-oxoglutarate (2OG) and Fe(II)-dependent oxygenase superfamily protein
AT2G34620	154.292	16.905	-3.19014	4.28875e-36	Mitochondrial transcription termination factor family protein
AT5G63180	123.877	14.4573	-3.09905	4.95428e-36	Pectin lyase-like superfamily protein
AT1G76160	96.3677	11.7031	-3.04166	5.42162e-36	SKU5 similar 5
AT3G60290	20.0692	2.00188	-3.32556	6.15282e-36	2-oxoglutarate (2OG) and Fe(II)-dependent oxygenase superfamily protein
AT4G24510	31.2396	3.45358	-3.17721	1.09679e-35	HXXXD-type acyl-transferase family protein
AT5G40390	31.6412	3.47482	-3.1868	1.35309e-35	Raffinose synthase family protein
AT2G23000	66.7467	7.88507	-3.0815	1.7277e-35	serine carboxypeptidase-like 10
AT3G51450	63.5244	7.95855	-2.99673	1.75809e-35	Calcium-dependent phosphotriesterase superfamily protein
AT1G54040	110.275	13.2085	-3.06157	2.04737e-35	epithiospecifier protein
AT2G40100	105.027	14.276	-2.8791	2.19765e-35	light harvesting complex photosystem II
AT1G76620	17.4514	1.71406	-3.34785	2.4009e-35	Protein of unknown function, DUF547
AT1G04520	19.7829	2.2622	-3.12845	3.63489e-35	plasmodesmata-located protein 2
AT4G12980	86.2463	12.2617	-2.8143	5.34614e-35	Auxin-responsive family protein
AT3G56370	50.6837	6.19217	-3.03301	8.36961e-35	Leucine-rich repeat protein kinase family protein
AT1G48480	51.5208	5.94586	-3.1152	9.43367e-35	receptor-like kinase 1
AT4G01883	79.4403	9.65708	-3.04021	2.04491e-34	Polyketide cyclase / dehydrase and lipid transport protein
AT1G41830	117.927	14.8456	-2.98978	2.21682e-34	SKU5-similar 6
AT2G38540	664.728	77.9811	-3.09157	3.25572e-34	lipid transfer protein 1
AT4G38950	32.6258	4.68536	-2.79978	3.44945e-34	ATP binding microtubule motor family protein
AT3G52370	18.481	2.21362	-3.06156	5.36988e-34	FASCICLIN-like arabinogalactan protein 15 precursor
AT1G20850	19.5427	2.32177	-3.07333	5.47825e-34	xylem cysteine peptidase 2
AT4G15210	103.189	12.1372	-3.08779	5.49114e-34	beta-amylase 5
AT5G48490	26.1445	2.25668	-3.53423	5.54617e-34	Bifunctional inhibitor/lipid-transfer protein/seed storage 2S albumin superfamily protein
AT3G63200	12.9331	1.45581	-3.15118	5.89049e-34	PATATIN-like protein 9
AT1G43790	8.92876	1.14404	-2.96432	5.99972e-34	tracheary element differentiation-related 6
AT1G54820	48.8214	6.94859	-2.81272	7.05812e-34	Protein kinase superfamily protein
AT5G59480	58.7282	7.31749	-3.00463	7.26963e-34	Haloacid dehalogenase-like hydrolase (HAD) superfamily protein
AT5G65730	139.709	21.0245	-2.73228	8.81868e-34	xyloglucan endotransglucosylase/hydrolase 6
AT3G17120	32.7277	3.59168	-3.18778	9.11292e-34
AT4G13575	41.6352	4.94616	-3.07342	1.24536e-33
AT3G21460	19.7031	1.26961	-3.95596	1.49032e-33	Glutaredoxin family protein
AT5G37300	5.93903	1.0035	-2.56518	1.58062e-33	O-acyltransferase (WSD1-like) family protein
AT4G22010	15.5645	1.98367	-2.97201	2.20645e-33	SKU5 similar 4
AT5G51890	15.5867	1.7242	-3.17632	2.26031e-33	Peroxidase superfamily protein
AT3G06035	21.1722	2.17301	-3.28441	2.76481e-33	Glycoprotein membrane precursor GPI-anchored
AT5G13220	20.5806	2.09289	-3.29772	2.93466e-33	jasmonate-zim-domain protein 10
AT4G11320	17.0483	2.21134	-2.94664	3.43013e-33	Papain family cysteine protease
AT1G29720	66.9589	7.74867	-3.11125	5.02874e-33	Leucine-rich repeat transmembrane protein kinase
AT5G03760	78.8746	8.41325	-3.22883	5.02874e-33	Nucleotide-diphospho-sugar transferases superfamily protein
AT5G23820	94.7238	5.35514	-4.14473	5.29786e-33	MD-2-related lipid recognition domain-containing protein
AT3G24460	48.902	7.87333	-2.63485	6.93326e-33	Serinc-domain containing serine and sphingolipid biosynthesis protein
AT4G30610	12.0679	1.3647	-3.14451	7.00075e-33	alpha/beta-Hydrolases superfamily protein
AT1G26560	89.3975	13.0845	-2.77238	9.35041e-33	beta glucosidase 40
AT5G38410	9447.29	1567.67	-2.59127	1.61544e-32	Ribulose bisphosphate carboxylase (small chain) family protein
AT4G21280	2758.58	425.865	-2.69546	2.26463e-32	photosystem II subunit QA
AT4G11911	6.10155	1.00701	-2.5991	2.79023e-32
AT3G26960	19.3123	2.23996	-3.10798	3.66895e-32	Pollen Ole e 1 allergen and extensin family protein
AT5G48300	658.375	103.52	-2.669	5.13383e-32	ADP glucose pyrophosphorylase 1
AT1G12110	114.325	19.2609	-2.56939	6.45748e-32	nitrate transporter 1.1
AT2G35860	40.8062	5.35148	-2.93078	1.46723e-31	FASCICLIN-like arabinogalactan protein 16 precursor
AT2G05440	19.7893	2.16913	-3.18953	2.29008e-31	GLYCINE RICH PROTEIN 9
AT1G55330	83.1176	4.58395	-4.18049	3.12064e-31	arabinogalactan protein 21
AT4G14440	40.2483	5.35222	-2.91072	5.53486e-31	3-hydroxyacyl-CoA dehydratase 1
AT4G23820	58.3087	8.16259	-2.83661	7.60873e-31	Pectin lyase-like superfamily protein
AT4G37450	16.8854	2.05434	-3.03903	1.05612e-30	arabinogalactan protein 18
AT1G24070	35.4952	5.47625	-2.69636	1.16714e-30	cellulose synthase-like A10
AT4G18970	34.3969	6.10567	-2.49405	1.40612e-30	GDSL-like Lipase/Acylhydrolase superfamily protein
AT2G38995	9.50933	1.35854	-2.80728	1.58228e-30	O-acyltransferase (WSD1-like) family protein
AT4G33790	9.6414	1.40495	-2.77873	1.971e-30	Jojoba acyl CoA reductase-related male sterility protein
AT4G34950	343.985	49.8887	-2.78556	2.13029e-30	Major facilitator superfamily protein
AT1G09310	1169.02	157.653	-2.89047	2.2693e-30	Protein of unknown function, DUF538
AT4G09650	2032.23	330.868	-2.61874	3.23866e-30	ATP synthase delta-subunit gene
AT4G12420	131.571	21.2062	-2.63328	4.04711e-30	Cupredoxin superfamily protein
AT5G44130	39.6328	6.28157	-2.6575	5.69931e-30	FASCICLIN-like arabinogalactan protein 13 precursor
AT4G23290	115.844	16.731	-2.79158	6.22488e-30	cysteine-rich RLK (RECEPTOR-like protein kinase) 21
AT1G38131	8.40922	1.23117	-2.77194	6.53627e-30	O-fucosyltransferase family protein
AT5G24150	325.728	59.4604	-2.45367	1.09161e-29	FAD/NAD(P)-binding oxidoreductase family protein
AT4G16980	478.203	81.218	-2.55775	1.12288e-29	arabinogalactan-protein family
AT2G19780	14.4542	1.66691	-3.11624	1.22089e-29	Leucine-rich repeat (LRR) family protein
AT2G39700	31.3246	5.43462	-2.52705	1.25542e-29	expansin A4
AT5G18660	215.543	36.5622	-2.55955	1.68071e-29	NAD(P)-binding Rossmann-fold superfamily protein
AT3G44860	201.121	23.7769	-3.08043	1.86282e-29	farnesoic acid carboxyl-O-methyltransferase
AT1G54020	10.795	1.42427	-2.92206	1.99292e-29	GDSL-like Lipase/Acylhydrolase superfamily protein
AT3G23530	89.8081	11.0541	-3.02227	2.08914e-29	Cyclopropane-fatty-acyl-phospholipid synthase
AT4G09010	597.047	97.3675	-2.61633	2.77058e-29	ascorbate peroxidase 4
AT5G22390	58.5236	10.6955	-2.45201	2.77058e-29	Protein of unknown function (DUF3049)
AT4G16740	9.9947	1.50476	-2.73163	3.05945e-29	terpene synthase 03
AT5G20270	34.7921	5.5629	-2.64485	3.72234e-29	heptahelical transmembrane protein1
AT4G29740	20.6609	3.01481	-2.77677	4.51226e-29	cytokinin oxidase 4
AT2G36830	433.343	76.7963	-2.4964	1.05092e-28	gamma tonoplast intrinsic protein
AT1G20190	36.9424	4.35665	-3.08398	1.26653e-28	expansin 11
AT5G39320	18.8642	2.44575	-2.9473	1.55828e-28	UDP-glucose 6-dehydrogenase family protein
AT3G55970	17.5019	2.68855	-2.70261	1.66811e-28	jasmonate-regulated gene 21
AT5G38430	3040.88	531.233	-2.51707	2.03485e-28	Ribulose bisphosphate carboxylase (small chain) family protein
AT1G56190	457.222	79.7878	-2.51866	2.0468e-28	Phosphoglycerate kinase family protein
AT5G02760	22.9999	4.04504	-2.5074	2.28794e-28	Protein phosphatase 2C family protein
AT3G52500	131.993	21.0765	-2.64675	2.30798e-28	Eukaryotic aspartyl protease family protein
AT4G34260	67.2024	11.7871	-2.5113	2.30798e-28	1,2-alpha-L-fucosidases
AT5G03260	5.21388	1.01051	-2.36727	2.52225e-28	laccase 11
AT1G47395	36.1625	1.24073	-4.86524	2.59323e-28
AT1G52230	1904.24	321.744	-2.56523	3.3017e-28	photosystem I subunit H2
AT5G61000	13.4443	1.80299	-2.89852	3.4892e-28	Replication factor-A protein 1-related
AT5G42860	11.8094	1.62125	-2.86476	3.58685e-28
AT5G45930	125.442	18.9986	-2.72305	6.28109e-28	magnesium chelatase i2
AT3G23820	298.865	49.9723	-2.58029	6.38006e-28	UDP-D-glucuronate 4-epimerase 6
AT1G77490	229.25	37.3701	-2.61697	8.12208e-28	thylakoidal ascorbate peroxidase
AT5G54270	8906.79	1520.08	-2.55076	9.90185e-28	light-harvesting chlorophyll B-binding protein 3
AT2G44940	20.3004	2.7847	-2.86591	1.29551e-27	Integrase-type DNA-binding superfamily protein
AT2G40475	21.9428	2.91531	-2.91203	1.34615e-27
AT1G44575	2993.76	525.987	-2.50886	2.04674e-27	Chlorophyll A-B binding family protein
AT5G05600	73.7007	13.2901	-2.47132	2.1758e-27	2-oxoglutarate (2OG) and Fe(II)-dependent oxygenase superfamily protein
AT2G21540	21.9866	3.0386	-2.85515	2.34992e-27	SEC14-like 3
AT3G27060	65.2264	9.36623	-2.79992	2.5896e-27	Ferritin/ribonucleotide reductase-like family protein
AT1G23205	23.9673	3.63569	-2.72077	3.13496e-27	Plant invertase/pectin methylesterase inhibitor superfamily protein
AT5G17220	12.9536	1.67371	-2.95224	3.56769e-27	glutathione S-transferase phi 12
AT4G00970	38.3776	5.79725	-2.72682	3.8572e-27	cysteine-rich RLK (RECEPTOR-like protein kinase) 41
AT1G53520	29.6779	3.30677	-3.16589	5.78986e-27	Chalcone-flavanone isomerase family protein
AT1G64670	15.1218	2.08551	-2.85816	6.33833e-27	alpha/beta-Hydrolases superfamily protein
AT4G08870	479.208	88.9435	-2.42969	6.60604e-27	Arginase/deacetylase superfamily protein
AT3G63110	36.4718	5.58302	-2.70766	6.96528e-27	isopentenyltransferase 3
AT1G72970	32.4073	4.91223	-2.72187	7.23594e-27	Glucose-methanol-choline (GMC) oxidoreductase family protein
AT1G22410	123.909	19.9524	-2.63464	7.90149e-27	Class-II DAHP synthetase family protein
AT1G11860	1899.33	336.73	-2.49583	1.09193e-26	Glycine cleavage T-protein family
AT3G26060	500.238	94.4647	-2.40477	1.25435e-26	Thioredoxin superfamily protein
AT2G46820	2836.52	506.204	-2.48633	1.38402e-26	photosystem I P subunit
AT3G16240	354.031	73.6502	-2.26512	1.75977e-26	delta tonoplast integral protein
AT5G55400	13.9409	1.78112	-2.96847	1.88984e-26	Actin binding Calponin homology (CH) domain-containing protein
AT3G07320	12.6151	1.93387	-2.70559	1.90133e-26	O-Glycosyl hydrolases family 17 protein
AT5G66740	16.4541	2.58921	-2.66786	2.837e-26	Protein of unknown function (DUF620)
AT1G65450	5.4759	1.09716	-2.31932	3.03081e-26	HXXXD-type acyl-transferase family protein
AT5G18600	98.4832	17.6355	-2.4814	3.27946e-26	Thioredoxin superfamily protein
AT1G02205	121.734	4.0623	-4.9053	3.54022e-26	Fatty acid hydroxylase superfamily
AT2G36880	271.641	48.9345	-2.47278	3.72446e-26	methionine adenosyltransferase 3
AT5G06390	52.1381	8.39711	-2.63437	4.75631e-26	FASCICLIN-like arabinogalactan protein 17 precursor
AT3G63160	763.069	151.979	-2.32795	4.90166e-26
AT2G05100	3825.57	763.248	-2.32545	5.2765e-26	photosystem II light harvesting complex gene 2.1
AT4G19120	60.1934	9.22022	-2.70673	6.03308e-26	S-adenosyl-L-methionine-dependent methyltransferases superfamily protein
AT2G28950	94.0067	15.7982	-2.573	8.46565e-26	expansin A6
AT5G43750	261.827	46.3157	-2.49904	9.44797e-26	NAD(P)H dehydrogenase 18
AT1G57770	78.5493	13.6181	-2.52807	9.91854e-26	FAD/NAD(P)-binding oxidoreductase family protein
AT1G19150	278.676	48.2744	-2.52926	9.93832e-26	photosystem I light harvesting complex gene 6
AT5G35740	7.57485	1.24253	-2.60793	1.21268e-25	Carbohydrate-binding X8 domain superfamily protein
AT2G34150	13.1969	2.09628	-2.65429	1.3284e-25	SCAR family protein
AT1G09200	47.389	6.53053	-2.85928	1.56844e-25	Histone superfamily protein
AT1G67740	1894.42	371.917	-2.34871	1.71509e-25	photosystem II BY
AT5G40380	26.0939	3.81786	-2.77288	1.73218e-25	cysteine-rich RLK (RECEPTOR-like protein kinase) 42
AT5G19730	18.2914	1.9009	-3.26641	2.36795e-25	Pectin lyase-like superfamily protein
AT5G61660	42.3707	7.08133	-2.58097	2.43272e-25	glycine-rich protein
AT4G13930	168.821	30.5628	-2.46565	2.96656e-25	serine hydroxymethyltransferase 4
AT3G23410	47.3788	8.11056	-2.54637	2.97925e-25	fatty alcohol oxidase 3
AT4G16370	298.042	51.9854	-2.51934	3.67507e-25	oligopeptide transporter
AT3G55500	8.05749	1.26271	-2.67381	3.84716e-25	expansin A16
AT3G62030	1254.59	225.734	-2.47452	3.92007e-25	rotamase CYP 4
AT2G05070	2743.65	570.01	-2.26704	4.58618e-25	photosystem II light harvesting complex gene 2.2
AT5G43760	134.016	23.2325	-2.52818	4.77012e-25	3-ketoacyl-CoA synthase 20
AT1G06830	37.612	5.74756	-2.71017	5.88708e-25	Glutaredoxin family protein
AT3G59970	406.657	77.3459	-2.39441	6.35922e-25	methylenetetrahydrofolate reductase 1
AT3G13520	74.9572	14.3604	-2.38398	8.34925e-25	arabinogalactan protein 12
AT2G45470	136.352	18.1837	-2.90662	8.42833e-25	FASCICLIN-like arabinogalactan protein 8
AT3G07010	50.8242	8.15325	-2.64007	9.72424e-25	Pectin lyase-like superfamily protein
AT5G12860	655.202	133.638	-2.29361	1.07895e-24	dicarboxylate transporter 1
AT1G04220	10.4978	1.72893	-2.60214	1.13172e-24	3-ketoacyl-CoA synthase 2
AT2G06850	93.715	19.6829	-2.25134	1.30683e-24	xyloglucan endotransglucosylase/hydrolase 4
AT2G36870	18.2284	2.43147	-2.90629	1.39092e-24	xyloglucan endotransglucosylase/hydrolase 32
AT5G14760	60.3915	11.5177	-2.39049	1.60036e-24	L-aspartate oxidase
AT5G13740	104.948	23.1745	-2.17907	1.65048e-24	zinc induced facilitator 1
AT3G48460	48.5119	9.06986	-2.41919	1.75875e-24	GDSL-like Lipase/Acylhydrolase superfamily protein
AT1G74890	5.10386	1.07529	-2.24687	1.84537e-24	response regulator 15
AT3G50660	20.1855	3.39268	-2.57282	1.91191e-24	Cytochrome P450 superfamily protein
AT1G69530	396.265	74.7718	-2.4059	2.41241e-24	expansin A1
AT3G02570	118.44	19.75	-2.58423	2.66311e-24	Mannose-6-phosphate isomerase, type I
AT4G00490	79.4547	14.9668	-2.40836	3.07593e-24	beta-amylase 2
AT2G26250	199.46	37.6005	-2.40727	3.58475e-24	3-ketoacyl-CoA synthase 10
AT5G38420	4843.53	1097.17	-2.14227	3.7618e-24	Ribulose bisphosphate carboxylase (small chain) family protein
AT1G32080	764.245	170.472	-2.1645	5.65912e-24	membrane protein, putative
AT1G63940	155.358	29.6196	-2.39097	8.74883e-24	monodehydroascorbate reductase 6
AT3G15520	100.853	18.5186	-2.44521	8.75431e-24	Cyclophilin-like peptidyl-prolyl cis-trans isomerase family protein
AT2G37180	40.5899	7.08181	-2.51893	9.36855e-24	Aquaporin-like superfamily protein
AT5G50950	582.324	110.369	-2.39948	1.00648e-23	FUMARASE 2
AT2G16660	106.466	20.6558	-2.36578	1.05636e-23	Major facilitator superfamily protein
AT1G02730	10.0603	1.78802	-2.49223	1.06536e-23	cellulose synthase-like D5
AT1G11670	10.3349	1.79853	-2.52264	1.5587e-23	MATE efflux family protein
AT1G04020	9.08111	1.62778	-2.47996	1.58371e-23	breast cancer associated RING 1
AT2G39330	98.5961	22.1522	-2.15408	1.98199e-23	jacalin-related lectin 23
AT5G04160	17.1098	2.65467	-2.68821	2.08746e-23	Nucleotide-sugar transporter family protein
AT1G76790	20.2922	3.4085	-2.57372	2.09318e-23	O-methyltransferase family protein
AT2G29980	116.124	26.3272	-2.14104	2.18116e-23	fatty acid desaturase 3
AT3G48520	12.0741	1.68189	-2.84377	2.24981e-23	cytochrome P450, family 94, subfamily B, polypeptide 3
AT5G26670	7.11365	1.33534	-2.41338	2.44395e-23	Pectinacetylesterase family protein
AT3G04790	463.047	99.83	-2.21361	2.71098e-23	Ribose 5-phosphate isomerase, type A protein
AT2G43120	19.317	3.18386	-2.60102	2.83131e-23	RmlC-like cupins superfamily protein
AT1G51780	4.02971	1	-2.01068	4.03388e-23	IAA-leucine resistant (ILR)-like gene 5
AT5G67210	7.47632	1.4522	-2.36409	4.57605e-23	Protein of unknown function (DUF579)
AT1G32220	218.456	47.2348	-2.20942	4.68458e-23	NAD(P)-binding Rossmann-fold superfamily protein
AT4G39510	20.6362	3.86893	-2.41517	4.89115e-23	cytochrome P450, family 96, subfamily A, polypeptide 12
AT3G21550	5.88246	1.11033	-2.40543	5.41899e-23	DUF679 domain membrane protein 2
AT3G06770	26.3959	4.78199	-2.46463	6.4834e-23	Pectin lyase-like superfamily protein
AT4G02850	8.89286	1.37134	-2.69706	6.8153e-23	phenazine biosynthesis PhzC/PhzF family protein
AT3G52750	98.202	18.342	-2.4206	6.8262e-23	Tubulin/FtsZ family protein
AT2G44230	54.8766	10.7582	-2.35075	8.02917e-23	Plant protein of unknown function (DUF946)
AT5G38130	4.75759	1.01752	-2.22517	9.14528e-23	HXXXD-type acyl-transferase family protein
AT3G23400	504.774	106.034	-2.25111	9.79124e-23	Plastid-lipid associated protein PAP / fibrillin family protein
AT2G22200	17.9697	1.95405	-3.20103	1.04614e-22	Integrase-type DNA-binding superfamily protein
AT5G48460	31.088	5.71257	-2.44414	1.10066e-22	Actin binding Calponin homology (CH) domain-containing protein
AT3G16250	153.627	29.0904	-2.40082	1.16965e-22	NDH-dependent cyclic electron flow 1
AT5G42650	695.329	153.433	-2.18009	1.31267e-22	allene oxide synthase
AT1G59740	8.41898	1.43829	-2.54929	1.38782e-22	Major facilitator superfamily protein
AT3G48730	219.888	45.8785	-2.26088	1.42105e-22	glutamate-1-semialdehyde 2,1-aminomutase 2
AT3G11945	132.389	27.2654	-2.27964	1.46309e-22	homogentisate prenyltransferase
AT5G42760	43.7151	8.7291	-2.32423	1.49806e-22	Leucine carboxyl methyltransferase
AT5G52540	72.9537	15.1429	-2.26834	1.53689e-22	Protein of unknown function (DUF819)
AT4G12830	95.9434	19.0299	-2.33391	2.41905e-22	alpha/beta-Hydrolases superfamily protein
AT4G21760	7.67024	1.24917	-2.6183	2.67597e-22	beta-glucosidase 47
AT2G28470	83.8011	17.7203	-2.24157	2.98504e-22	beta-galactosidase 8
AT5G46290	149.633	32.3036	-2.21166	3.22202e-22	3-ketoacyl-acyl carrier protein synthase I
AT3G25180	4.93374	1.10199	-2.16257	3.52653e-22	cytochrome P450, family 82, subfamily G, polypeptide 1
AT4G22730	14.0006	2.45361	-2.51252	3.87819e-22	Leucine-rich repeat protein kinase family protein
AT5G14200	315.96	62.3842	-2.34049	3.8907e-22	isopropylmalate dehydrogenase 1
AT5G24105	8.34389	1.30948	-2.67172	4.16972e-22	arabinogalactan protein 41
AT1G24020	33.7071	2.64926	-3.66939	6.35006e-22	MLP-like protein 423
AT1G78570	121.809	22.0081	-2.46852	6.57245e-22	rhamnose biosynthesis 1
AT3G03780	294.838	58.7943	-2.32617	7.16878e-22	methionine synthase 2
AT4G01460	22.9963	4.73006	-2.28147	7.60597e-22	basic helix-loop-helix (bHLH) DNA-binding superfamily protein
AT3G58120	18.6798	3.30576	-2.49842	8.9911e-22	Basic-leucine zipper (bZIP) transcription factor family protein
AT4G09950	4.87229	1.03154	-2.2398	1.14158e-21	P-loop containing nucleoside triphosphate hydrolases superfamily protein
AT3G11630	1086.29	224.669	-2.27354	1.20533e-21	Thioredoxin superfamily protein
AT5G10170	35.7365	7.92828	-2.17232	1.26373e-21	myo-inositol-1-phosphate synthase 3
AT2G27140	5.61695	1.12302	-2.32241	1.30704e-21	HSP20-like chaperones superfamily protein
AT3G27960	16.2168	2.90942	-2.47869	1.35001e-21	Tetratricopeptide repeat (TPR)-like superfamily protein
AT2G47240	46.3682	9.26928	-2.32261	1.35464e-21	AMP-dependent synthetase and ligase family protein
AT1G13609	21.2944	1.16544	-4.19153	1.57109e-21	Defensin-like (DEFL) family protein
AT2G27820	49.1525	10.2197	-2.26591	1.76179e-21	prephenate dehydratase 1
AT1G19450	148.57	33.8078	-2.13572	1.88973e-21	Major facilitator superfamily protein
AT2G33330	27.0653	5.25569	-2.36449	2.09628e-21	plasmodesmata-located protein 3
AT1G10370	103.866	10.1083	-3.36111	2.18756e-21	Glutathione S-transferase family protein
AT3G28270	137.617	34.2629	-2.00594	2.38168e-21	Protein of unknown function (DUF677)
AT1G29952	10.9241	1.0035	-3.44439	2.49943e-21	conserved peptide upstream open reading frame 34
AT2G35190	12.113	2.03379	-2.57431	2.61573e-21	novel plant snare 11
AT1G32900	344.962	79.7135	-2.11354	3.46063e-21	UDP-Glycosyltransferase superfamily protein
AT5G05250	106.528	16.8062	-2.66418	3.55087e-21
AT4G33220	117.822	23.1976	-2.34457	3.92442e-21	pectin methylesterase 44
AT5G14740	2692.87	607.458	-2.14829	3.93461e-21	carbonic anhydrase 2
AT2G32990	8.87373	1.75866	-2.33507	4.44161e-21	glycosyl hydrolase 9B8
AT3G61820	42.3447	8.32415	-2.34681	6.3344e-21	Eukaryotic aspartyl protease family protein
AT1G11545	8.60918	1.57883	-2.44702	6.59499e-21	xyloglucan endotransglucosylase/hydrolase 8
AT5G09730	7.24943	1.44434	-2.32745	7.44894e-21	beta-xylosidase 3
AT5G08020	6.85147	1.25788	-2.44542	9.80567e-21	RPA70-kDa subunit B
AT1G68530	431.742	99.9453	-2.11096	1.15739e-20	3-ketoacyl-CoA synthase 6
AT3G48420	337.214	73.4917	-2.19801	1.20853e-20	Haloacid dehalogenase-like hydrolase (HAD) superfamily protein
AT1G10470	152.259	36.0343	-2.07909	1.24055e-20	response regulator 4
AT1G44900	13.9987	2.70315	-2.37258	1.24089e-20	minichromosome maintenance (MCM2/3/5) family protein
AT1G26770	44.0557	9.39793	-2.22891	1.25443e-20	expansin A10
AT4G18480	811.528	182.312	-2.15423	1.25462e-20	P-loop containing nucleoside triphosphate hydrolases superfamily protein
AT1G67750	9.73486	1.76397	-2.46434	1.36772e-20	Pectate lyase family protein
AT1G58370	5.1698	1.11383	-2.21457	1.4813e-20	glycosyl hydrolase family 10 protein / carbohydrate-binding domain-containing protein
AT2G03090	10.3266	1.93775	-2.41391	1.6406e-20	expansin A15
AT1G75680	82.5629	16.8217	-2.29517	2.56798e-20	glycosyl hydrolase 9B7
AT4G32800	17.0306	3.31861	-2.35947	2.56798e-20	Integrase-type DNA-binding superfamily protein
AT1G01190	5.82667	1.24689	-2.22434	2.731e-20	cytochrome P450, family 78, subfamily A, polypeptide 8
AT5G21920	134.112	29.6463	-2.17752	2.87146e-20	YGGT family protein
AT2G44740	11.2206	1.97725	-2.50459	2.87871e-20	cyclin p4;1
AT3G01480	448.302	106.236	-2.0772	3.26035e-20	cyclophilin 38
AT2G43945	137.495	29.2239	-2.23416	3.48022e-20
AT1G19670	482.159	114.024	-2.08017	3.60163e-20	chlorophyllase 1
AT1G64980	70.1106	14.5076	-2.27282	3.70969e-20	Nucleotide-diphospho-sugar transferases superfamily protein
AT1G19940	4.57733	1.07879	-2.08509	3.93181e-20	glycosyl hydrolase 9B5
AT2G22810	6.52801	1.27057	-2.36117	4.11917e-20	1-aminocyclopropane-1-carboxylate synthase 4
AT2G05790	61.6527	15.1879	-2.02124	5.00544e-20	O-Glycosyl hydrolases family 17 protein
AT1G15980	442.456	102.673	-2.10748	5.53082e-20	NDH-dependent cyclic electron flow 1
AT5G09870	169.89	40.7953	-2.05812	5.53082e-20	cellulose synthase 5
AT3G20470	54.0165	8.92927	-2.59679	6.37225e-20	glycine-rich protein 5
AT5G64290	222.482	51.7189	-2.10492	6.67437e-20	dicarboxylate transport 2.1
AT1G18810	27.9231	5.51054	-2.34119	6.77116e-20	phytochrome kinase substrate-related
AT5G46220	8.79824	1.59635	-2.46244	7.5742e-20	Protein of unknown function (DUF616)
AT5G45472	27.819	6.06447	-2.19762	7.65777e-20
AT3G59400	277.39	64.7003	-2.10007	8.02049e-20	enzyme binding;tetrapyrrole binding
AT4G08300	15.1841	2.22148	-2.77297	8.10494e-20	nodulin MtN21 /EamA-like transporter family protein
AT4G36360	83.5875	20.5485	-2.02426	8.86027e-20	beta-galactosidase 3
AT1G68590	425.901	99.6027	-2.09626	9.04914e-20	Ribosomal protein PSRP-3/Ycf65
AT3G01810	61.7559	13.4536	-2.19858	9.04914e-20
AT3G14930	245.474	59.3805	-2.04751	9.04914e-20	Uroporphyrinogen decarboxylase
AT2G29550	54.8817	12.0279	-2.18994	9.782e-20	tubulin beta-7 chain
AT1G17840	87.078	18.507	-2.23423	9.81624e-20	white-brown complex homolog protein 11
AT1G43670	348.741	78.3722	-2.15374	1.00864e-19	Inositol monophosphatase family protein
AT4G34220	58.6684	14.4909	-2.01744	1.01371e-19	Leucine-rich repeat protein kinase family protein
AT1G69523	27.9572	6.2529	-2.16062	1.09794e-19	S-adenosyl-L-methionine-dependent methyltransferases superfamily protein
AT1G04160	8.1121	1.52324	-2.41293	1.28488e-19	myosin XI B
AT2G23130	28.6892	4.09655	-2.80803	1.29223e-19	arabinogalactan protein 17
AT1G04800	8.52101	1.81558	-2.2306	1.31296e-19	glycine-rich protein
AT4G37410	11.6689	1.22464	-3.25224	1.50947e-19	cytochrome P450, family 81, subfamily F, polypeptide 4
AT3G21560	33.0882	6.69343	-2.3055	1.66401e-19	UDP-Glycosyltransferase superfamily protein
AT5G04890	6.54713	1.27407	-2.36142	1.83112e-19	HSP20-like chaperones superfamily protein
AT2G24170	8.50131	1.48432	-2.51788	1.91807e-19	Endomembrane protein 70 protein family
AT2G16890	10.5154	2.21049	-2.25007	2.01284e-19	UDP-Glycosyltransferase superfamily protein
AT1G22330	10.0066	1.87876	-2.4131	2.09753e-19	RNA-binding (RRM/RBD/RNP motifs) family protein
AT5G26000	2517.13	603.041	-2.06145	2.20229e-19	thioglucoside glucohydrolase 1
AT2G22770	7.65404	1.47769	-2.37288	2.20603e-19	basic helix-loop-helix (bHLH) DNA-binding superfamily protein
AT5G51560	20.7072	4.09076	-2.33969	2.2241e-19	Leucine-rich repeat protein kinase family protein
AT2G31040	247.68	58.2946	-2.08704	2.2273e-19	ATP synthase protein I -related
AT5G22090	187.011	45.7576	-2.03104	2.97998e-19	Protein of unknown function (DUF3049)
AT4G38770	802.61	32.4596	-4.62798	3.07724e-19	proline-rich protein 4
AT2G25830	70.6824	15.805	-2.16097	3.57135e-19	YebC-related
AT4G16155	104.541	20.2748	-2.36632	3.98523e-19	dihydrolipoyl dehydrogenases
AT3G14395	4.4433	1.02803	-2.11174	4.27764e-19
AT2G41770	28.9301	5.99073	-2.27177	4.57588e-19	Protein of unknown function (DUF288)
AT4G01690	191.685	46.0937	-2.05609	4.59104e-19	Flavin containing amine oxidoreductase family
AT3G54830	44.413	9.11573	-2.28455	4.72644e-19	Transmembrane amino acid transporter family protein
AT5G02940	374.899	92.0476	-2.02605	5.61655e-19	Protein of unknown function (DUF1012)
AT1G07370	8.87296	1.90223	-2.22173	6.28881e-19	proliferating cellular nuclear antigen 1
AT3G55800	2092.6	493.053	-2.08549	6.69041e-19	sedoheptulose-bisphosphatase
AT1G45191	13.3963	2.63269	-2.34722	7.48174e-19	Glycosyl hydrolase superfamily protein
AT1G03820	12.2047	2.8945	-2.07605	7.7237e-19
AT2G41540	12.9142	2.29746	-2.49085	7.74309e-19	6-phosphogluconate dehydrogenase family protein
AT1G70330	28.2871	5.45597	-2.37424	8.13325e-19	equilibrative nucleotide transporter 1
AT1G10657	21.6469	4.89126	-2.14588	8.75895e-19	Plant protein 1589 of unknown function
AT3G23110	18.3538	3.80426	-2.27039	9.45749e-19	receptor like protein 37
AT4G38860	102.806	14.9918	-2.77768	9.92357e-19	SAUR-like auxin-responsive protein family
AT3G46490	5.11772	1.07577	-2.25014	1.01937e-18	2-oxoglutarate (2OG) and Fe(II)-dependent oxygenase superfamily protein
AT4G27860	30.8012	7.43754	-2.05009	1.39662e-18	vacuolar iron transporter (VIT) family protein
AT1G01630	61.9592	13.8863	-2.15765	1.45184e-18	Sec14p-like phosphatidylinositol transfer family protein
AT2G40490	271.574	66.466	-2.03066	1.78047e-18	Uroporphyrinogen decarboxylase
AT5G48900	13.3867	2.29624	-2.54346	1.78627e-18	Pectin lyase-like superfamily protein
AT4G20940	5.96849	1.32833	-2.16775	1.86021e-18	Leucine-rich receptor-like protein kinase family protein
AT1G75220	96.9377	22.3408	-2.11738	1.97174e-18	Major facilitator superfamily protein
AT1G09750	51.8612	11.7713	-2.13939	2.56126e-18	Eukaryotic aspartyl protease family protein
AT5G46110	2191.14	544.998	-2.00736	3.14632e-18	Glucose-6-phosphate/phosphate translocator-related
AT1G65860	63.558	14.4889	-2.13313	3.95353e-18	flavin-monooxygenase glucosinolate S-oxygenase 1
AT3G14940	17.5278	3.71554	-2.238	3.97232e-18	phosphoenolpyruvate carboxylase 3
AT4G27560	51.9977	11.9662	-2.11948	4.03231e-18	UDP-Glycosyltransferase superfamily protein
AT2G43100	153.743	36.9219	-2.05797	4.44353e-18	isopropylmalate isomerase 2
AT5G49330	5.78354	1.19443	-2.27563	4.56381e-18	myb domain protein 111
AT4G35320	19.4333	3.0026	-2.69425	4.81324e-18
AT3G19480	85.2229	16.9932	-2.32628	5.48076e-18	D-3-phosphoglycerate dehydrogenase
AT3G26450	152.576	35.0689	-2.12126	7.10565e-18	Polyketide cyclase/dehydrase and lipid transport superfamily protein
AT4G02060	12.9776	3.03005	-2.09861	8.76586e-18	Minichromosome maintenance (MCM2/3/5) family protein
AT3G10720	58.3112	11.9191	-2.2905	1.00149e-17	Plant invertase/pectin methylesterase inhibitor superfamily
AT1G13080	83.325	20.3043	-2.03697	1.01783e-17	cytochrome P450, family 71, subfamily B, polypeptide 2
AT5G44680	88.4664	21.8814	-2.01542	1.05326e-17	DNA glycosylase superfamily protein
AT2G35760	17.0161	3.24885	-2.3889	1.07645e-17	Uncharacterised protein family (UPF0497)
AT1G70730	204.992	50.9549	-2.00828	1.15964e-17	Phosphoglucomutase/phosphomannomutase family protein
AT3G02230	39.7091	9.1135	-2.12339	1.25061e-17	reversibly glycosylated polypeptide 1
AT3G09820	202.225	46.0323	-2.13525	1.36919e-17	adenosine kinase 1
AT5G15600	7.64313	1.87589	-2.02659	1.43779e-17	SPIRAL1-like4
AT4G18280	24.8571	5.08537	-2.28923	1.44359e-17	glycine-rich cell wall protein-related
AT5G55620	86.3627	17.1967	-2.32827	1.93834e-17
AT3G46940	12.2173	2.86147	-2.0941	1.93998e-17	DUTP-PYROPHOSPHATASE-LIKE 1
AT1G70700	378.618	91.2126	-2.05344	2.09841e-17	TIFY domain/Divergent CCT motif family protein
AT4G30400	17.598	3.62284	-2.28022	2.10966e-17	RING/U-box superfamily protein
AT2G40610	74.4791	18.1148	-2.03967	2.12958e-17	expansin A8
AT1G11790	28.027	6.77551	-2.04842	2.17139e-17	arogenate dehydratase 1
AT3G55110	9.4982	1.8854	-2.33279	2.2819e-17	ABC-2 type transporter family protein
AT5G49030	148.651	31.7559	-2.22684	2.53794e-17	tRNA synthetase class I (I, L, M and V) family protein
AT5G12050	12.5796	2.48562	-2.33941	3.15251e-17
AT2G16630	6.62613	1.62948	-2.02375	3.22202e-17	Pollen Ole e 1 allergen and extensin family protein
AT2G47880	21.1629	4.14874	-2.35079	3.81477e-17	Glutaredoxin family protein
AT3G07340	14.1799	2.96283	-2.2588	3.83871e-17	basic helix-loop-helix (bHLH) DNA-binding superfamily protein
AT5G55480	20.5485	4.99612	-2.04016	4.17631e-17	SHV3-like 1
AT3G12920	23.1752	5.52568	-2.06836	4.64503e-17	SBP (S-ribonuclease binding protein) family protein
AT5G08050	262.547	63.2542	-2.05334	4.69114e-17	Protein of unknown function (DUF1118)
AT4G23800	9.88683	2.01362	-2.29572	5.80161e-17	HMG (high mobility group) box protein
AT1G74030	13.4956	3.2918	-2.03554	5.8881e-17	enolase 1
AT5G28237	7.43066	1.17558	-2.66011	5.91371e-17	Pyridoxal-5'-phosphate-dependent enzyme family protein
AT5G62920	23.7402	2.35549	-3.33324	7.9661e-17	response regulator 6
AT2G27920	33.6031	7.42995	-2.17717	8.24435e-17	serine carboxypeptidase-like 51
AT1G64150	54.2751	12.3663	-2.13388	8.79212e-17	Uncharacterized protein family (UPF0016)
AT3G25760	170.266	41.3469	-2.04194	8.87172e-17	allene oxide cyclase 1
AT1G18360	43.1774	9.94681	-2.11797	9.14416e-17	alpha/beta-Hydrolases superfamily protein
AT5G42270	1005.5	205.019	-2.29409	1.18221e-16	FtsH extracellular protease family
AT2G32500	90.7905	22.6132	-2.00538	1.23238e-16	Stress responsive alpha-beta barrel domain protein
AT4G04750	21.4707	4.58145	-2.22849	1.26062e-16	Major facilitator superfamily protein
AT5G46690	16.5959	3.44896	-2.26659	1.30806e-16	beta HLH protein 71
AT5G49100	38.2137	8.59987	-2.1517	1.50866e-16
AT1G30280	10.12	2.37726	-2.08983	1.54292e-16	Chaperone DnaJ-domain superfamily protein
AT1G30282	8.25373	1.63925	-2.33201	1.60877e-16	other RNA
AT1G75150	5.2016	1.23468	-2.07482	2.17306e-16
AT2G18890	14.8711	2.91834	-2.3493	2.3219e-16	Protein kinase superfamily protein
AT1G54010	13.6809	2.5384	-2.43017	2.4153e-16	GDSL-like Lipase/Acylhydrolase superfamily protein
AT1G78210	27.9248	6.66433	-2.06702	2.48763e-16	alpha/beta-Hydrolases superfamily protein
AT2G36885	16.5227	4.12415	-2.00228	3.20656e-16
AT4G24010	8.06978	1.7723	-2.1869	3.26651e-16	cellulose synthase like G1
AT3G52290	18.753	4.04133	-2.21422	3.37958e-16	IQ-domain 3
AT4G36250	90.2506	20.6551	-2.12744	3.45699e-16	aldehyde dehydrogenase 3F1
AT4G25780	7.70281	1.86113	-2.04921	3.49516e-16	CAP (Cysteine-rich secretory proteins, Antigen 5, and Pathogenesis-related 1 protein) superfamily protein
AT5G38120	8.08284	2.01871	-2.00143	3.63162e-16	AMP-dependent synthetase and ligase family protein
AT5G03350	148.428	17.4893	-3.08522	3.72482e-16	Legume lectin family protein
AT2G37025	5.64387	1.27407	-2.14724	3.74621e-16	TRF-like 8
AT2G22230	51.4624	12.2069	-2.07582	4.16148e-16	Thioesterase superfamily protein
AT1G56580	81.8638	13.5491	-2.59503	4.28728e-16	Protein of unknown function, DUF538
AT2G01890	9.38018	2.16106	-2.11788	4.54921e-16	purple acid phosphatase 8
AT5G13400	31.1254	3.55987	-3.12819	5.19571e-16	Major facilitator superfamily protein
AT3G12145	22.686	5.45665	-2.05571	5.37733e-16	Leucine-rich repeat (LRR) family protein
AT4G36950	7.82728	1.79466	-2.1248	5.53024e-16	mitogen-activated protein kinase kinase kinase 21
AT5G63060	28.6802	6.49937	-2.14169	5.66077e-16	Sec14p-like phosphatidylinositol transfer family protein
AT3G48350	15.8097	3.52159	-2.16651	7.08694e-16	Cysteine proteinases superfamily protein
AT1G07720	64.8007	16.1254	-2.00668	8.09259e-16	3-ketoacyl-CoA synthase 3
AT5G47380	7.44705	1.58632	-2.23099	1.02131e-15	Protein of unknown function, DUF547
AT5G46570	21.213	5.043	-2.0726	1.05214e-15	BR-signaling kinase 2
AT5G43870	27.2996	6.72921	-2.02037	1.39268e-15	Plant protein of unknown function (DUF828) with plant pleckstrin homology-like region
AT5G60020	7.33273	1.77098	-2.0498	1.59378e-15	laccase 17
AT1G65870	10.7653	2.37566	-2.17999	1.9942e-15	Disease resistance-responsive (dirigent-like protein) family protein
AT3G16660	12.6506	1.67334	-2.91841	2.13587e-15	Pollen Ole e 1 allergen and extensin family protein
AT1G65900	18.0185	4.1473	-2.11923	2.31179e-15
AT2G22170	31.4207	4.21803	-2.89707	2.52909e-15	Lipase/lipooxygenase, PLAT/LH2 family protein
AT1G78370	748.551	122.484	-2.61151	2.59732e-15	glutathione S-transferase TAU 20
AT1G66400	23.995	5.13878	-2.22324	2.9232e-15	calmodulin like 23
AT5G15740	31.7708	7.44683	-2.093	3.15673e-15	O-fucosyltransferase family protein
AT1G02335	6.72194	1.10114	-2.60987	4.13214e-15	germin-like protein subfamily 2 member 2 precursor
AT5G60890	50.5683	12.1156	-2.06137	5.29951e-15	myb domain protein 34
AT1G57820	9.72588	2.38039	-2.03063	5.47068e-15	Zinc finger (C3HC4-type RING finger) family protein
AT3G59010	13.3235	2.93103	-2.18449	5.64163e-15	pectin methylesterase 61
AT5G54970	10.3289	2.36335	-2.12778	5.76301e-15
AT5G03120	21.0863	2.58024	-3.03073	6.4218e-15
AT5G28910	7.77071	1.80867	-2.10311	7.12015e-15
AT5G59870	47.7688	5.46313	-3.12827	7.54125e-15	histone H2A 6
AT2G41170	8.76897	2.01096	-2.12452	8.41985e-15	F-box family protein
AT5G15230	47.2936	9.3572	-2.3375	8.7279e-15	GAST1 protein homolog 4
AT4G14310	5.91054	1.44965	-2.02758	9.00678e-15	Transducin/WD40 repeat-like superfamily protein
AT4G02420	29.5145	6.89317	-2.09819	9.484e-15	Concanavalin A-like lectin protein kinase family protein
AT1G27460	22.1408	5.45273	-2.02166	1.08108e-14	no pollen germination related 1
AT5G43745	71.0835	9.71782	-2.87081	1.14344e-14	Protein of unknown function (DUF1012)
AT1G73370	6.13646	1.44047	-2.09087	1.17535e-14	sucrose synthase 6
AT1G19950	9.70579	2.10908	-2.20223	1.75783e-14	HVA22-like protein H (ATHVA22H)
AT1G65010	84.083	17.62	-2.2546	1.79843e-14	Plant protein of unknown function (DUF827)
AT5G52280	26.6518	6.42642	-2.05215	1.8446e-14	Myosin heavy chain-related protein
AT4G15700	14.9874	3.44184	-2.1225	1.99767e-14	Thioredoxin superfamily protein
AT4G28660	288.17	62.0904	-2.21448	2.05982e-14	photosystem II reaction center PSB28 protein
AT4G13840	133.022	26.8567	-2.30831	2.33498e-14	HXXXD-type acyl-transferase family protein
AT1G30250	27.4376	1.71093	-4.0033	2.59828e-14
AT1G02950	6.83899	1.43951	-2.2482	2.71432e-14	glutathione S-transferase F4
AT5G13060	5.44741	1.30826	-2.05792	3.97233e-14	ARMADILLO BTB protein 1
AT2G31270	7.83334	1.80299	-2.11923	4.58267e-14	homolog of yeast CDT1 A
AT4G10390	9.45315	2.21107	-2.09605	4.84013e-14	Protein kinase superfamily protein
AT4G31870	20.8215	4.83519	-2.10643	5.72686e-14	glutathione peroxidase 7
AT2G17630	10.244	2.47283	-2.05055	5.82638e-14	Pyridoxal phosphate (PLP)-dependent transferases superfamily protein
AT3G53190	12.7371	2.958	-2.10634	6.38429e-14	Pectin lyase-like superfamily protein
AT3G15356	55.4004	13.5134	-2.03551	6.51085e-14	Legume lectin family protein
AT4G22290	22.4789	5.56449	-2.01425	6.54081e-14	Ubiquitin-specific protease family C19-related protein
AT3G53750	39.1869	8.04371	-2.28444	6.84449e-14	actin 3
AT4G21750	53.4527	9.11584	-2.55182	8.60235e-14	Homeobox-leucine zipper family protein / lipid-binding START domain-containing protein
AT5G47330	9.25572	2.14848	-2.10703	8.76324e-14	alpha/beta-Hydrolases superfamily protein
AT3G14740	6.01161	1.48071	-2.02146	1.07021e-13	RING/FYVE/PHD zinc finger superfamily protein
AT5G14700	26.5766	6.04143	-2.13719	1.10631e-13	NAD(P)-binding Rossmann-fold superfamily protein
AT4G15660	14.8192	3.62481	-2.0315	1.32966e-13	Thioredoxin superfamily protein
AT4G25830	12.5129	2.93262	-2.09316	1.93509e-13	Uncharacterised protein family (UPF0497)
AT3G22231	288.963	43.2582	-2.73984	2.27198e-13	pathogen and circadian controlled 1
AT1G25425	7.82105	1.90148	-2.04024	2.92445e-13	CLAVATA3/ESR-RELATED 43
AT3G25670	6.32862	1.46547	-2.11052	3.07914e-13	Leucine-rich repeat (LRR) family protein
AT1G07610	39.9138	6.00039	-2.73376	5.05116e-13	metallothionein 1C
AT1G29920	8358.12	1975.36	-2.08106	5.32511e-13	chlorophyll A/B-binding protein 2
AT2G18328	84.913	12.3932	-2.77643	5.40483e-13	RAD-like 4
AT1G19050	35.0216	4.48472	-2.96516	5.89567e-13	response regulator 7
AT2G38760	10.1725	1.78499	-2.51068	6.07154e-13	annexin 3
AT4G39970	195.182	48.0262	-2.02292	7.06553e-13	Haloacid dehalogenase-like hydrolase (HAD) superfamily protein
AT1G19440	26.578	6.61081	-2.00733	1.00172e-12	3-ketoacyl-CoA synthase 4
AT1G61610	11.0852	2.67533	-2.05085	1.08877e-12	S-locus lectin protein kinase family protein
AT3G06870	12.413	2.89354	-2.10094	1.35146e-12	proline-rich family protein
AT1G45010	29.4181	2.29188	-3.6821	1.41913e-12	TRAM, LAG1 and CLN8 (TLC) lipid-sensing domain containing protein
AT5G13630	3574.34	678.012	-2.39829	1.48395e-12	magnesium-chelatase subunit chlH, chloroplast, putative / Mg-protoporphyrin IX chelatase, putative (CHLH)
AT2G02780	12.5293	2.96968	-2.07692	2.83467e-12	Leucine-rich repeat protein kinase family protein
AT1G62520	6.3694	1.55563	-2.03366	2.93571e-12
AT1G51500	181.863	31.3962	-2.53419	6.12954e-12	ABC-2 type transporter family protein
AT5G41460	9.33276	2.03475	-2.19745	6.14063e-12	Protein of unknown function (DUF604)
AT1G51060	74.0351	17.1844	-2.10711	6.27352e-12	histone H2A 10
AT3G06880	39.5043	2.8722	-3.78178	7.73703e-12	Transducin/WD40 repeat-like superfamily protein
AT5G35970	492.486	67.5934	-2.86513	8.52506e-12	P-loop containing nucleoside triphosphate hydrolases superfamily protein
AT1G67040	8.03933	1.87451	-2.10056	9.28906e-12
AT1G29890	22.101	4.48663	-2.30041	1.36803e-11	O-acetyltransferase family protein
AT4G38840	53.3343	10.5298	-2.34058	1.43038e-11	SAUR-like auxin-responsive protein family
AT1G13650	156.342	16.3414	-3.2581	1.98717e-11
AT5G10390	16.4627	3.94533	-2.06098	2.31425e-11	Histone superfamily protein
AT3G18890	387.653	60.1642	-2.68779	4.31534e-11	NAD(P)-binding Rossmann-fold superfamily protein
AT3G13404	4.68873	1.06525	-2.138	4.56632e-11
AT5G45520	5.32372	1.32531	-2.00611	4.87384e-11	Leucine-rich repeat (LRR) family protein
AT1G29500	7.02432	1.71682	-2.03262	9.33925e-11	SAUR-like auxin-responsive protein family
AT5G65360	54.1468	11.2254	-2.27011	2.42662e-10	Histone superfamily protein
AT4G15680	12.2979	2.09968	-2.55017	2.83506e-10	Thioredoxin superfamily protein
AT4G30650	108.314	22.4811	-2.26844	3.79532e-10	Low temperature and salt responsive protein family
AT1G15825	5.94741	1.22814	-2.27578	7.43393e-10	hydroxyproline-rich glycoprotein family protein
AT2G32640	47.0525	11.3612	-2.05015	8.27559e-10	Lycopene beta/epsilon cyclase protein
AT5G65683	21.3263	5.25527	-2.0208	1.9075e-09	Zinc finger (C3HC4-type RING finger) family protein
AT3G25500	40.5446	9.33135	-2.11935	3.84973e-09	formin homology 1
AT5G41140	44.8905	7.98515	-2.49102	5.10207e-09	Myosin heavy chain-related protein
AT5G46730	36.0087	2.0871	-4.10878	1.05305e-08	glycine-rich protein
AT1G27940	6.1105	1.49701	-2.0292	1.34945e-08	P-glycoprotein 13
AT5G15780	13.0673	2.84756	-2.19816	1.44925e-08	Pollen Ole e 1 allergen and extensin family protein
AT3G49670	55.886	12.2839	-2.18572	2.73305e-08	Leucine-rich receptor-like protein kinase family protein
AT2G01830	30.1679	3.80618	-2.9866	4.52104e-08	CHASE domain containing histidine kinase protein
AT1G52830	4.84929	1.17643	-2.04336	2.20296e-07	indole-3-acetic acid 6
AT5G04020	32.0395	7.13878	-2.1661	6.31486e-07	calmodulin binding
AT1G78170	16.9321	3.4256	-2.30533	6.35409e-07
AT4G04410	25.5363	5.07241	-2.33181	7.46954e-07	transposable element gene
AT4G25960	69.5417	10.4046	-2.74065	8.85303e-07	P-glycoprotein 2
AT5G10400	25.5392	5.52514	-2.20863	9.82349e-07	Histone superfamily protein
AT5G39860	12.8473	1.75696	-2.87031	2.46156e-06	basic helix-loop-helix (bHLH) DNA-binding family protein
AT2G20290	15.3892	2.58432	-2.57406	3.50056e-06	myosin-like protein XIG
AT2G26080	775.746	190.26	-2.02761	3.67309e-06	glycine decarboxylase P-protein 2
AT3G18290	231.383	43.8385	-2.40001	8.42329e-06	zinc finger protein-related
AT5G67100	12.0158	2.12926	-2.49651	1.11489e-05	DNA-directed DNA polymerases
AT1G53300	34.246	5.26477	-2.70149	1.39833e-05	tetratricopetide-repeat thioredoxin-like 1
AT2G21650	9.97464	2.2622	-2.14054	2.28463e-05	Homeodomain-like superfamily protein
AT2G26910	127.757	26.5468	-2.2668	4.35052e-05	pleiotropic drug resistance 4
AT3G23450	120.88	8.35341	-3.85506	4.50068e-05
AT4G33010	2436.67	553.531	-2.13818	5.22974e-05	glycine decarboxylase P-protein 1
AT4G26542	30.145	4.95216	-2.60579	0.000344839
AT4G38850	8.88586	1.76843	-2.32904	0.000426887	SAUR-like auxin-responsive protein family
AT4G19020	27.7181	5.71623	-2.27769	0.00044123	chromomethylase 2
